# Supplementary material for: CSF Diagnostics: A Potentially Valuable Tool in Neurodegenerative and Inflammatory Disorders Involving Motor Neurons: A Review
Source: MDPI journal article supplement (doi:10.3390/diagnostics11091522), 2021-08-24

Supplementary Figure S1: Flow Diagram displaying the search strategy, keywords, as well as inclusion and exclusion criteria for A) Amyotrophic Lateral Sclerosis (ALS), B) Peripheral neuropathies, C) Spinal muscular atrophy (SMA).

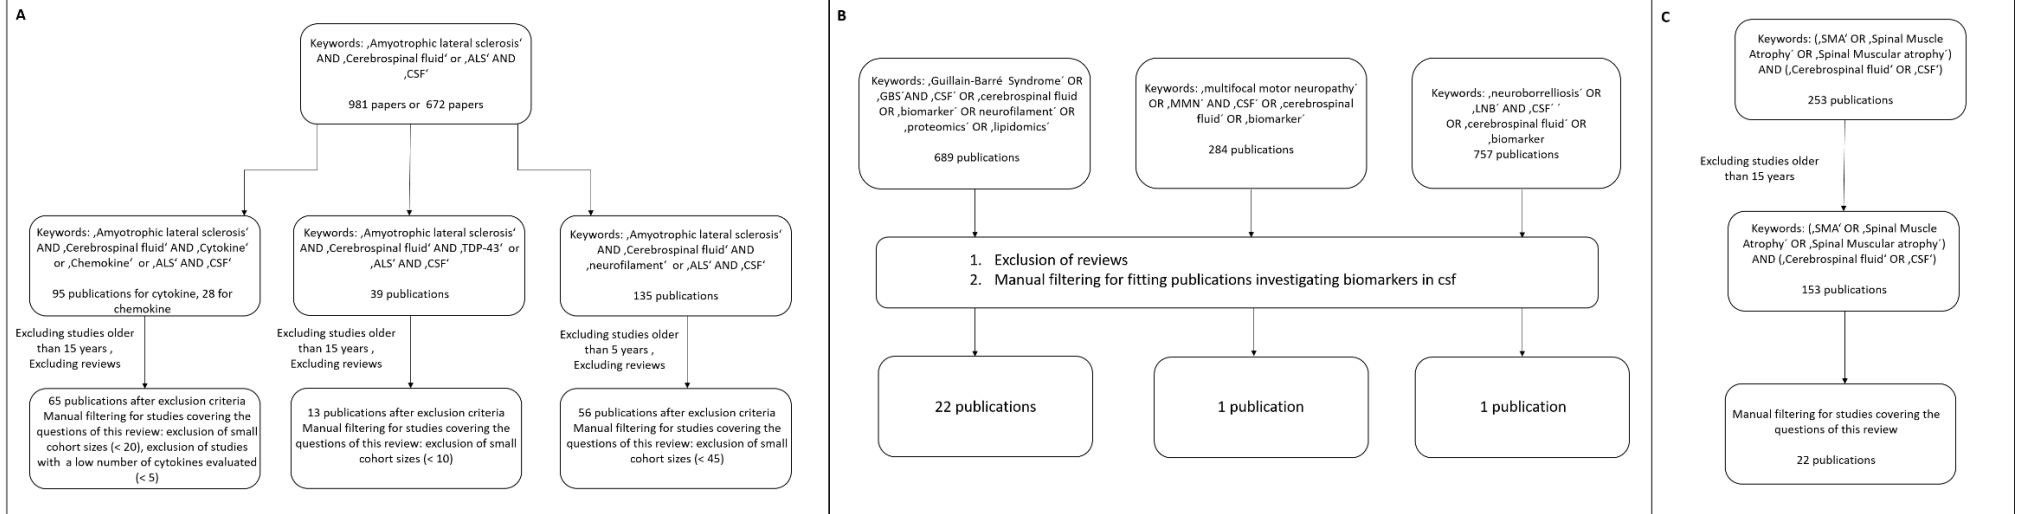

Supplement: s1 [file s1]
