# Supplementary material for: CSF Diagnostics: A Potentially Valuable Tool in Neurodegenerative and Inflammatory Disorders Involving Motor Neurons: A Review
Source: Diagnostics (Basel). 2021 Aug 24;11(9):1522. doi: 10.3390/diagnostics11091522 (PMC8470638; doi:10.3390/diagnostics11091522)
Supplement: Supplementary file 1 [file diagnostics-11-01522-s001.zip]

Archive with 4 entries (4 files):
- Supplementary Figure s1.pdf
- Supplementary table s1.xlsx
- Supplementary table s2.xlsx
- Supplementary table s3.xlsx
