# Supplementary material for: CSF Diagnostics: A Potentially Valuable Tool in Neurodegenerative and Inflammatory Disorders Involving Motor Neurons: A Review
Source: Diagnostics (Basel). 2021 Aug 24;11(9):1522. doi: 10.3390/diagnostics11091522 (PMC8470638; doi:10.3390/diagnostics11091522)
Supplement: Supplementary file 1 [file diagnostics-11-01522-s001.zip › Supplementary table s1.xlsx]

## Sheet: Overview
Paper	Cohort Size	Cohort composition and Age	Patient criteria	Body fluid	Marker	Method	Cytokine Marker	Statistics	Result Overview	Correlation with ALSFRS-R
Tateishi et al., 2010	42 ALS, 34 OND and 12 patients with sporadic LMND (lower motor neuron disease)	42 ALS (sporadic): 20 males, 22 females (56.7 +/- 13.2 years) LMND: six males and females (55.2 +/- 15.7 years) OND: 21 males, 13 females (54.2 +/- 12.9 years)	EI Esorical diagnostic criteria	CSF	Cytokines	Multiplexed fluorescent bead-based immunoassay (27 cytokines and chemokines; Bio-Plex Cytokine Assay System, Bio-Rad Laboratories, Hercules, CA)	IL-1ß, IL-1, IL-1ra, IL-2, IL-4, IL-5, IL-6, IL-7, IL-9, IL-10, IL-12, IL-13, IL-15, IL-17, TNF-a, IFN-y, CCL2, CCL3, CCL4, CCL5, CCL11, CXCL8, CXCL10, G-CSF, G-CSF, GM-CSF, bFGF, PDGFbb and VEGF	non parametric Kruskal-Wallis H test (compare the age at examination and CSF cytokine levels among the studied group), Mann-Whitney U test (significance of differences, disease duration, CSF protein amounts), Bonferroni-Dunn's correction (p < 0.05), Spearman's rankk correlation (crrelation of clinical data and CSF cytokine levels), chi-square-test (male to female ratios between the groups)	increased in ALS (compared to OND): G-CSF, VEGF, CCL2, CCL4, CCL5, CCL11, CXCL8, CXCL10, TNF-a, IFN-y, IL-1ß, IL-7, IL-9, IL-12 and IL-17 no difference between OND and LMND no difference between ALS and LMND
Mitchell et al., 2009	41 ALS and 33 neurologic disease control	41 ALS: 39 sporadic ALS, 2 familial ALS; 9 with bulbar onset, 32 with limb onset		CSF	Cytokines	Multiplex cytokine bead assay, Bio-Plex Human 27-plex panel of cytokines and growth factors (Bio-Rad; Hercules, CA) HFE genotyping: QIAmp DNA Mini kit (Qiagen; Valencia, CA)	ß-2 microglobulin, IL-1ra, IL-9, IL-17, TNF-a, eotaxin, IL-2, IL-8, IFN-y induced protein-10, FGF basic, G-CSF, IL-4, IL-10, MCP-1, PDGF bb, GM-CSF, IL-5, IL-12 (p70), MIP-1a, VEGF, IFN-y, IL-6, IL-13, MIP-1ß, total iron, IL-1ß, IL-7, IL-15, RANTES, Transferrin	Kolmogorov-Smirnov test (for normal distribution of analyte expression) , t-test or Mann-Withney U test (p < 0.05; comparison between groups), Spearman or Pearson correlation coefficient (p < 0.05; Correlation between markers and ALSFRS-R, duration of symptoms and age)	increased in ALS: IL-6, GM-CSF, IL-2, IL-15, IL-17, MIP-1b, FGF basic, G-CSF, VEGF, MIP-1a, MCP-1 increased in CTRL: IL-10, IFN-y not detected: IL-1ß
Furukawa et al., 2015	26 ALS, 12 MMN, 8 PMA, 10 ONDs	12 MMN: 12 males (41.1 +/- 16.4 years) 8 PMA: 7 males, 1 female (67.1 +/- 9.4 years) 10 OND: 9 males, 1 female (70.3 +/- 11.4 years) 26 ALS (definite in 7, probable in 6, propable-laboratory supported in 5, possible in 8; bulbar onset in 7, trunk onset in 3, upper limbs onset in 10, lower limbs onset in 6): 16 males, 11 females (65.0 +/- 8.9 years)	ALS: EI Esorical criteria MMN: European Federation of Neurological Societies and the Peripheral Nerve Society *for PMA	CSF	Cytokines	Multiplex bead array assay, Bio Plex Pro Human Cytokine 27-plex Assay (Bio Plex, Hercules, CA); ELISA kit for TNFR1 (Cosmo Bio, Tokyo, Japan)	IL-1ß, IL-1Ra, IL-2, IL-4, IL-5, IL-6, IL-7, IL-8/CXCL8, IL-9, IL-10, IL-13, IL-15, IL-17, CCL11, FGF-2, G-CSF, GM-CSF, IFN-y, IP-10/CXCL-10, MCP-1/CCL2, MIP-1a/CCL3, MIP-1ß/CCL4, PDGF-BB, CCL5, TNF-a and VEGF; TNFR1	Kruskal-Wallis test and Dunn multiple comparison post hoc analysis (differences between ONDs, PMA, ALS and MMN), Kruskal-Wallis, x2, student t and Mann-Whithney U test (differences in clinical data), Spearman rank correlation (correlation between cytokines and clinical data), p values < 0.05	increased in ALS (compared to OND): IL-4, IL-7, IL-17, eotaxin/ CCL11, FGF-2, G-CSF, PDGF-BB increased in ALS (compared to MMN): IL-4, IL-17, FGF-2, G-CSF increased in MMN (compared to ONDs): IL-1ra increased in PMA (compared to OND): IL-1ra, IL-7, IL-10, IL-17, eotaxin/CCL11, FGF-2, G-CSF, PDGF-BB, VEGF, TNFR1 increased in PMA (compared to MMN): IL-10, FGF-2, G-CSF, VEGF	IL-10: increased in patients with high ALSFRS-R scores IL-4 and eotaxin/ CCL11: increased in patients with lower ALSFR-R scores	*PMA: diagnosed within 5 years, clinical and electrophysiologic evidence of LMN involvement in 2 or more of 4 regions (bulbar, cervical, thoracic, lumbosacral), no CB in nerve conduction studies, no clinical UMN signs and symptoms
Italiani et al., 2014	144 ALS (54 CSF)	125 sALS: 69 females and 56 males (63.28 (32-82) years; upper limb 45, lower limb 58, bulbar 22)		CSF and serum	Cytokines	ELISA - ELISA kit MBL (Woburn, Massachusetts, US): IL-18 - ELISA kit R&D Systems Inc. (Minneapolis, New Mexico, US): hsIL-18BPa, hIL-1ß, hIL-1Ra, hsIL-1R2, hIL-33, hsIL-1R4 - ELISA kit AdipoGen, Inc. (Seoul, South Korea): hIL-37	IL-1ß, IL-18, IL-33, IL-37, IL-1Ra, sIL-1R2, IL-18BP, sIL1R4	Mann-Whitney U-test, Spearman's rank correlation (disease activity score and serum levels of cytokines), p < 0.05	increased in ALS (serum): IL-18, IL-18BP, free IL-18

## Sheet: Marker Panel Studies
Paper	Cohort Size and Composition	Body fluid	Method	Marker Panel
Tateishi et al., 2010	42 ALS, 12 LMND, 34 ONDs	CSF	Multiplex fluorescent bead-based immunoassay (Bio-Plex Cytokine Assay System; Bio-Rad Laboratories, Hercules, CA)	IL-1ß, IL-1, IL-1ra, IL-2, IL-4, IL-5, IL-6, IL-7, IL-9, IL-10, IL-12, IL-13, IL-15, IL-17, TNF-a, IFN-y, CCL2, CCL3, CCL4, CCL5, CCL11, CXCL8, CXCL10, G-CSF, GM-CSF, bFGF, PDGFbb and VEGF
Mitchell et al., 2009	41 ALS, 33 controls	CSF	Multiplex cytokine bead assay (Bio-Plex Assay; Bio-Rad, Hercules, CA)	ß-2 microglobulin, IL-1ra, IL-9, IL-17, TNF-a, eotaxin, IL-2, IL-8, IFN-y induced protein-10, FGF basic, G-CSF, IL-4, IL-10, MCP-1, PDGF bb, GM-CSF, IL-5, IL-12 (p70), MIP-1a, VEGF, IFN-y, IL-6, IL-13, MIP-1ß, total iron, IL-1ß, IL-7, IL-15, RANTES, Transferrin
Furukawa et al., 2015	26 ALS, 12 MMN, 8 PMA, 10 ONDs	CSF	Multiplex bead array assay (Bio-Plex Assay; Bio Plex, Hercules, CA); ELISA (Cosmo Bio, Tokyo, Japan)	IL-1ß, IL-1Ra, IL-2, IL-4, IL-5, IL-6, IL-7, IL-8/CXCL8, IL-9, IL-10, IL-12, IL-13, IL-15, IL-17, Eotaxin/CCL11, FGF-2, G-CSF, GM-CSF, IFN-y, IP-10/CXCL10, MCP-1/CCL2, MIP-1a/CCL3, MIP-1ß/CCL4, PDGF-BB, RANTES/CCL5, TNF-a and VEGF; TNFR1
Italiani et al., 2014	54 ALS, 40 controls	CSF and serum	ELISA kit for IL-18: MBL (Woburn, Massachusetts, US); ELISA kit for hsIL-18BPa, hIL-1ß, hIL-1Ra, hsIL-1R2, hIL-33, hIL-1R4: R&D Systems Inc. (Minneapolis, New Mexico, US); ELISA kit for hIL-37: AdipoGen, Inc. (Seoul, South Korea)	IL-1ß, IL-18, IL-33, IL-37, IL-1Ra, sIL-1R2, IL-18BP, sIL1R4
LMND: Lower motor neuron disease
MMN: multifocal morot neuropathy
PMA: progressive muscular atrophy

## Sheet: Table Cytokines
	Tateishi et al.,	Mitchell et al.,	Furukawa et al.,	Italiani et al., serum	Italiani et al., CSF
IL-1ß*+	0.0348		0.2 +/- 0.1	<7.8	<7.8 (n=1; 47.2)
IL-1ra_*+			11.2 +/- 13.5	<78.1	<78.1 (n=1; 547.4)
IL-2_*		0.000428	5.3 +/- 8.3
IL-4_*			1.1 +/- 1.7
IL-5_*			0.6 +/- 1.2
IL-6_*		1e-06	6.6 +/- 3.7
IL-7_*	0.0135		1.6 +/- 1.9
IL-9_*	0.002		10.8 +/- 5.2
IL-10_*			5.5 +/- 7.0
IL-12 (p70)_*	0.0339		1.0 +/- 1.4
IL-13_*			4.1 +/- 3.3
IL-15_*		0.0001511	11.5 +/- 19.4
IL-17_*	0.0027	0.002101	32.1 +/- 54.0
TNF-a_*	0.0031		12.6 +/- 9.0
IFN-y_*	0.0132		11.9 +/- 8.8
CCL2/ MCP-1_*	< 0.0001	0.047217	372.2 +/- 156.1
CCL3/ MIP-1a_*		0.042665	0.7 +/- 0.8
CCL4/ MIP-1ß_*	0.0048	0.002165	28.8 +/- 12.9
CCL5/ RANTES_*	0.0165		6.4 +/- 8.5
CCL11/ eotaxin_*	0.0072		6.6 +/- 12.9
CXCL8/ IL-8_*	< 0.0001		73.7 +/- 21.9
CXCL10/ IP-10*	< 0.0001		1560.2 +/- 908.8
G-CSF_*	0.0005	0.007361	27.6 +/- 43.8
GM-CSF_*		2.1e-05	325.8 +/- 221.3
bFGF_		0.005317
PDGFbb_*			6.3 +/- 6.3
VEGF_*	0.0039	0.00742	25.0 +/- 16.3
ß2M
total iron
Transferrin
FGF2			36.7 +/- 31.7
TNFR1			0.9 +/- 0.4
sIL-1R2				<312.5	5673.4 +/- 2771.5
IL-33				<300 (n=3; 72.9 +/- 32.3)	625.4 +/- 1570.5
sIL-1R4				<62.5 (n=4; 85.1 +/- 13.2)	72.4 +/- 16.4
IL-37				<46.8	<46.8
IL-36^				NT	888.3 +/- 729.3
IL-18					< 0.0001
IL-18BP					< 0.0001

## Sheet: Cytokine Panels
Study	Cytokine Panel
Tateishi et al.,	IL-1ß, IL-1, IL-1ra, IL-2, IL-4, IL-5, IL-6, IL-7, IL-9, IL-10, IL-12, IL-13, IL-15, IL-17, TNF-a, IFN-y, CCL2, CCL3, CCL4, CCL5, CCL11, CXCL8, CXCL10, G-CSF, G-CSF, GM-CSF, bFGF, PDGFbb and VEGF
Mitchell et al.,	ß-2 microglobulin, IL-1ra, IL-9, IL-17, TNF-a, eotaxin, IL-2, IL-8, IFN-y induced protein-10, FGF basic, G-CSF, IL-4, IL-10, MCP-1, PDGF bb, GM-CSF, IL-5, IL-12 (p70), MIP-1a, VEGF, IFN-y, IL-6, IL-13, MIP-1ß, total iron, IL-1ß, IL-7, IL-15, RANTES, Transferrin
Furukawa et al.	IL-1ß, IL-1ra, IL-2, IL-4, IL-5, IL-6, IL-7, IL-8/CXCL8, IL-9, IL-10, IL-12 (p70), IL-13, IL-15, IL-17, eotaxin/ CCL11, FGF-2, G-CSF, GM-CSF, IFN-y, IP-10/CXCL10, MCP-1/CCL2, MIP 1a/ CCL3, MIP-1ß/ CCL4, PDGF-BB, CCL5, TNF-a, VEGF; TNFR1
Italiani et al.,	IL-1ß, IL-18, IL-33, IL-37, IL-1Ra, sIL-1R2, IL-18BP, sIL1R4

## Sheet: Mitchell et al.,
Marker	p Value	Fold difference
ALS > neurologic disease control
IL-6	1e-06	1.25
GM-CSF	2.1e-05	1.4
IL-2	0.000428	1.19
IL-15	0.0001511	1.29
IL-17	0.002101	1.3
MIP-1b	0.002165	1.17
FGF basic	0.005317	1.67
G-FGF	0.007361	1.51
VEGF	0.00742	1.3
MIP-1a	0.042665	1.08
MCP-1	0.047217	1.25
Neurologic disease control > ALS
IL-10	<0.000001	1.66
IFN-y	0.032836	1.26

## Sheet: Tateishi et al.,
Cytokines examines	Alterations	p value
IL-1ß	increase	0.0348
IL-7	increase	0.0135
IL-9	increase	0.002
IL-12	increase	0.0339
IL-17	increase	0.0027
TNF-alpha	increase	0.0031
IFN-y	increase	0.0132
CCL2	increase	< 0.0001
CCL4	increase	0.0048
CCL5	increase	0.0165
CCL11	increase	0.0072
CXCL8	increase	< 0.0001
CXCL10	increase	< 0.0001
G-CSF	increase	0.0005
VEGF	increase	0.0039

## Sheet: Furukawa et al.,
	ONDs (n = 10)	MMN (n = 12)	PMA (n = 8)	ALS (n = 26)
IL-1ß	0.2 +/- 0.3	0.2 +/- 0.3	0.7 +/- 1.0	0.2 +/- 0.1
IL-1ra	ND	12.3 +/- 13.7	21.2 +/- 21.7	11.2 +/- 13.5
IL-2	0.5 +/- 0.7	1.3 +/- 2.1	12.5 +/- 13.1	5.3 +/- 8.3
IL-4	0.2 +/- 0.1	0.2 +/- 0.2	1.1 +/- 1.1	1.1 +/- 1.7
IL-5	0.4 +/- 0.3	0.2 +/- 0.4	1.1 +/- 1.6	0.6 +/- 1.2
IL-6	6.0 +/- 2.0	3.3 +/- 2.6	7.3 +/- 2.9	6.6 +/- 3.7
IL-7	0.1 +/- 0.2	1.3 +/- 1.8	3.7 +/- 2.9	1.6 +/- 1.9
IL-8/CXCL8	57.3 +/- 15.0	41.0 +/- 19.3	79.3 +/- 31.3	73.7 +/- 21.9
IL-9	9.7 +/- 1.6	10.1 +/- 10.8	13.5 +/- 6.3	10.8 +/- 5.2
IL-10	1.1 +/- 0.5	2.5 +/- 7.0	12.6 +/- 11.8	5.5 +/- 7.0
IL-12 (p70)	0.3 +/- 0.4	1.7 +/- 2.8	3.1 +/- 3.9	1.0 +/- 1.4
IL-13	2.5 +/- 1.4	3.2 +/- 5.6	10.5 +/- 11.4	4.1 +/- 3.3
IL-15	4.3 +/- 3.5	4.0 +/- 4.6	29.1 +/- 33.4	11.5 +/- 19.4
IL-17	4.4 +/- 9.2	3.6 +/- 4.4	42.2 +/- 40.9	32.1 +/- 54.0
Eotaxin/ CCL11	ND	0.3 +/- 0.6	5.8 +/- 5.1	6.6 +/- 12.9
FGF-2	6.8 +/- 3.9	9.0 +/- 9.6	45.6 +/- 30.7	36.7 +/- 31.7
G-CSF	6.3 +/- 2.9	9.2 +/- 10.0	33.8 +/- 24.2	27.6 +/- 43.8
GM-CSF	332.9 +/- 28.0	266.0 +/- 129.5	357.3 +/- 250.9	325.8 +/- 221.3
IFN-y	8.6 +/- 2.3	9.5 +/- 12.3	18.0 +/- 17.0	11.9 +/- 8.8
IP-10/ CXCL10	1200.1 +/- 270.8	661.7 +/- 535.1	1193.0 +/- 179.9	1560.2 +/- 908.8
MCP-1/ CCL2	283.0 +/- 52.2	188.8 +/- 94.5	464.9 +/- 244.7	372.2 +/- 156.1
MCP-1α/ CCL3	0.6 +/- 0.2	0.6 +/- 1.0	1.4 +/- 1.3	0.7 +/- 0.8
MIP-1ß/ CCL4	26.9 +/- 12.0	17.1 +/- 9.2	38.0 +/- 24.2	28.8 +/- 12.9
PDGF-BB	1.2 +/- 3.7	4.0 +/- 5.5	10.7 +/- 10.6	6.3 +/- 6.3
RANTES/ CCL5	1.8 +/- 1.3	3.0 +/- 3.2	6.9 +/- 7.7	6.4 +/- 8.5
TNF-α	6.7 +/- 2.1	4.1 +/- 5.3	18.0 +/- 8.8	12.6 +/- 9.0
VEGF	12.3 +/- 1.5	12.6 +/- 13.2	40.0 +/- 23.5	25.0 +/- 16.3
TNFR1	0.8 +/- 0.2	0.6 +/- 0.3	0.6 +/- 0.3	0.9 +/- 0.4

## Sheet: Italiani et al.,
	CSF		Serum
	ALS	Controls	ALS	Controls
IL-1ß	<7.8	<7.8	<7.8 (n=1; 47.2)	<7.8 (n=1; 26.6)
IL-1Ra	<78.1	<78.1 (n=1; 101.7)	<78.1 (n=1; 547.4)	<78.1 (n=1; 26.6)
sIL-1R2	<312.5	<312.5 (n=1; 325.7)	5673.4 +/- 2771.5	5575.0 +/- 1359.5
IL-33	<300 (n=3; 72.9 +/- 32.3)	<30.0 (n=3, 54.8 +/- 27.1)	625.4 +/- 1570.5	536.3 +/- 1166.3
sIL-1R4	<62.5 (n=4; 85.1 +/- 13.2)	<62.5 (n=2; 85.5 +/- 3.9)	72.4 +/- 16.4	79.9 +/- 28.3
IL-37	<46.8	<46.8	<46.8	<46.8 (n=1; 74.7)
IL-36	NT	NT	888.3 +/- 729.3	1531.7 +/- 1843.2
IL-18	< 0.0001
IL-18BP	< 0.0001
free IL-18	0.0171
