# Supplementary material for: CSF Diagnostics: A Potentially Valuable Tool in Neurodegenerative and Inflammatory Disorders Involving Motor Neurons: A Review
Source: Diagnostics (Basel). 2021 Aug 24;11(9):1522. doi: 10.3390/diagnostics11091522 (PMC8470638; doi:10.3390/diagnostics11091522)
Supplement: Supplementary file 1 [file diagnostics-11-01522-s001.zip › Supplementary table s2.xlsx]

## Sheet: Tabelle1
Paper	Cohort size and composition	Age in years	Mutations	Patient Criteria	Body Fluid	Marker	Method for TDP-43	Antibody	Statistics	Results TDP-43 ng/mL	ROC curve values
Kasai et al., 2009	30 ALS, 29 controls (13 controls, 16 disease controls)	ALS: 65.3 (42-85), Control: 68.8 (54-84)	no family history of ALS no SOD1 mutations	El Escorial	CSF	TDP-43	Sandwich ELISA (Nunc MaxiSorp, Xat-bottom 96-well Black MicroWell plate, Roskilde, Denmark)	anti-TDP-43 monoclonal antibody, detection antibody, anti-TDP-43 rabbit polyclonal antibody (10782-2-AP, ProteinTech Group, Chicago, USA), raised against a recombinant protein corresponding to residues 1–261 of human TDP-43 (H00023435-M01, clone 2E2-D3, Abnova Corporation, Walnut, USA), detection antibody, anti-TDP-43 rabbit polyclonal antibody (10782-2-AP, ProteinTech Group, Chicago, USA),	Mann–Whitney U test (Differences between the SALS and control groups), level of significance p < 0.	ALS:6.92 +/- 3.71; Control: 5.31 +/- 0.94
Noto et al., 2010	27 ALS, 50 disease controls (15 PD, 15 MS, 20 Guillan Barre)	no information	no information	El Escorial, Awaji	CSF	TDP-43	Sandwich ELISA (Nunc MaxiSorp, Xat-bottom 96-well Black MicroWell plate, Roskilde, Denmark)	anti-TDP-43 monoclonal antibody (H00023435- M01, clone 2E2-D3, Abnova Corporation, Walnut, USA), detection antibody, anti-TDP-43 rabbit polyclonal antibody (10782- 2-AP, ProteinTech Group, Chicago, USA)	Unpaired t -test or χ 2 test (Univariate comparison of the CSF TDP-43 levels and clinical variables) Spearman ' s test (correlation test), ANOVA and Bonferroni procedure (multiple comparisons) Receiver operating characteristic curve (ROC) analysis (determination of the best cut-off values for the CSF TDP-43 level), Kaplan-Meier method (survival curves), log-rank test (differences in survival). Co…	ALS: 29.5 +/- 15.5; Control PD: 19.7 +/- 6.6, Control MS: 13.7 +/- 9.0, Control Guillain-Barre: 16.7 +/- 7.5	cut-off value: 27.9 ng/ml, sensitivity: 59.3%, specificity: 96.0%.
Hosogawa et al., 2014	13 ALS, 7 Guillan Barre	ALS 60 +/- 15, GBS 49 +/- 20	no information	El Escorial	CSF	TDP-43	Sandwich ELISA (Nunc MaxiSorp, Xat-bottom 96-well Black MicroWell plate, Roskilde, Denmark)	monoclonal antibody, clone 2E2-D3 (Abnova Corp., Taipei, Taiwan), for capture and a rabbit polyclonal antibody (catalog code 10782-2-AP, ProteinTech Group Inc., Chicago, IL) for detection.	The data are presented as means ± SEM. Mann–Whitney U test (significance of difference between values, p < 0.05 was considered to show a statistically significant difference), receiver operating characteristic (ROC) curve analysis (determination of the best cutoff value for the TDP-43 level in the CSF)	ALS: 1.68 +/- 0.15; GBS: 1.05 +/- 0.13	Cut off: 1.16 ng/ml (when the AUC was 0.874 with a standard error of 0.079 and 95% CI 0.719–1.029 ,p = 0.007), sensitivity: 84.6% (95% CI: 54.6% to 98.1%), specificity: 71.4% (95% CI: 29.0% to 96.3%), negative predictive value: 62.5%, positive predictive value: 83.3%, odds ratio: 13.75
Steinacker et al., 2008	15 ALS, 12 FTLD, 9 ALS + FTLD, 3 ALS + frontal disinhibition, 13 controls	ALS: 48 +/- 7.1, ALS plus DI: 53 +/- 14, ALS+ FTLD: 63 +/- 7.1, Controls: 60 +/- 8	no information	MMSE, DSM-IV, El Escorial	CSF	TDP-43	Immunoblot	Affinity purified polyclonal rabbit antibody raised against amino acids 1 through 260 of recombinant TDP-43 (1:2000 and 1:10 000 to 1:1000; Proteintech Group Inc, Chicago, Illinois), Monoclonal TDP-43 antibody clone 2E2-D3 specific for amino acids 205 through 25517 (1:1000; Abnova, Taipei City, Taiwan). Polyclonal rabbit antisera raised against N-terminus amino acids 6 through 24 or against C-ter…	The 45-kDa TDP-43 bands from CSF detected by rabbit TDP-43 antibody were quantified in relation to an internal standard (mouse neuroblastoma RIPA cell homogenate). Band volumes were determined using Quantity One, Bio-Rad and were calculated relative to the volume of the 46-kDa band present in mouse neuroblastoma cell homogenate. The TDP-43 band was quantified from duplicates or triplicates and di…	not applicable	not applicable
Feneberg et al., 2014	9 ALS, 4 FTLD, 8 controls	ALS: 64 +/- 4.2; FTLD: 66 +/- 14.1; Control: 62 */- 13.9	no information	El Escorial	CSF, Plasma and Brain	TDP-43	Immunoblot	Antibodies against different TDP-43 epitopes (N-terminus, C-terminus, and aa 205 – 222), against calnexin, GP Ib-V-IX and flotillin-1. Standard (human Jurkat cells and murine neuroblastoma (N2A) cells were used)	no information	not applicable	not applicable
