# Supplementary material for: CSF Diagnostics: A Potentially Valuable Tool in Neurodegenerative and Inflammatory Disorders Involving Motor Neurons: A Review
Source: Diagnostics (Basel). 2021 Aug 24;11(9):1522. doi: 10.3390/diagnostics11091522 (PMC8470638; doi:10.3390/diagnostics11091522)
Supplement: Supplementary file 1 [file diagnostics-11-01522-s001.zip › Supplementary table s3.xlsx]

## Sheet: Tabelle1
Paper	Cohort size and composition	Age	Mutations	Patient Criteria	Body Fluid	Marker	Method for Nfl, pNfl	Statistics	Results pNFH pg/mL	Results Nfl pg/mL	ROC curve values
Poesen et al., 2017	220 ALS, 316 neurologic disease controls (DC), 50 disease mimics (DM)	ALS: 64 (27–85), DC: 60 (8–86) DM: 57 (25–79)	ALS: C9orf72 (12), SOD1 (9), FUS (3), TARDBP (2)	El Escorial criteria, ALSFRS-R score	CSF	Nfl, pNFH	ELISA kits for pNfH (Biovendor, Brno, Czech Republic; RD191138300R, average test-retest variance of 6.8%) and NfL (UmanDiagnostics AB, Umea, Sweden; UD51001, average test-retest variance of 4.9%).	Shapiro-Wilk test (Normality of data), Kruskal-Wallis test and 2-tailed unpaired Mann-Whitney U test significance 5% (non-normally distributed data),Dunn post hoc comparison Verification of differences between groups at a significance level of 5%), Receiver operating characteristic (ROC) curves (diagnostic performance of pNfH and NfL), Youden index (optimal cutoff), Med Calc (Calculation of sensi…	ALS: 2,366 (114–18,089), DC: 289 (24–18,740) DM: 296 (24–7,049)	ALS: 9,427 (370–108,909). DC: 1,790 (262–53,677), DM: 1,407 (613–36,597)	pNfH cutoff to discriminate ALS from DC: 618 pg/mL; sensitivity: 81.5% (CI 74.3-87.3%); specificity: 88.2% (CI 75.7%–95.5%); Likelyhood ratio: 6.9 (CI 4.7-10.2, AUC: 0.890 (Cl 0.852-0.920) NfL cutoff to discriminate ALS from DC: 3,819 pg/mL; sensitivity: 78.8% (CI 71.4-85.0%); specificity: 72.7 % (CI 66.0-78.8%), Likelyhood ratio: 2.9 (CI 2.3–3.7), AUC: 0.809 (Cl 0.763-0-0.849) pNfH cutoff to dis…
Rossi et al., 2018	190 ALS, 130 mixed neurological diseases CTL-1 (non-inflammatory neurological diseases), CTL-2 (patients with acute/subacute inflammatory diseases and tumors)	ALS: 64 (57–71), neurological diseases: 64 (52–72), 63 (56–72)	no mutations	El Escorial criteria, ALSFRS-R score	CSF	Nfl, pNFH	Single-batch ELISA kits for NF-L assays (iMyBioSource San Diego, USA and UmanDiagnostics AB, Umeå, Sweden). For pNF-ELISA kit from BioVendor Research and Diagnostic Product, Czech Republic)	Receiver Operating Characteristic (ROC) (Calculation of sensitivity and specificity of the NF-L and pNF-H), Youden Index (cutoff calculation) , Area under curve (AUC) (cutoff, sensitivity, specificity, 95% confidence interval (CI), likelihood ratio (LR), predictive values), Mann–Whitney Rank Sum Test and the Kruskal–Wallis One-Way Analysis of Variance on Ranks (Nonparametric data comparisons), Ch…	ALS:1,700 (760–3,170), CTRL 1: 30 (0.00-320) CTRL2: 820 (0.00–3470)	MyoBioSource kit: ALS: 2,140 (1,350–3,300), CTRL 1: 2,040 (1,250-3,390) CTRL2: 3,090 (1,120-4,590); UmanDiagnostics kit: ALS: 4,700 (760-3,170) CTRL 1: 300 (0.00-320) CTRL 2: 820 (0.00-3,470)	pNfH cutoff ALS vs CTRL 1: 460 pg/mL ; sensitivity: 84% Cl (78.1-88.5); specificity: 82.9% Cl (73.2-89.6); AUC: 0.869 CI (0.814-0-924), ALS vs CTRl 2: cutoff: 210 pg/mL; sensitivity: 90.7% Cl (85.6-94.1); specificity: 43.9% Cl (29.9-59.0); AUC: 0.597 CI (0.474-0.719), ALS vs DM: cuttoff: 460 pg/mL; sensitivity: 84.5% Cl (78.6-88.9); specificity: 63.0% Cl (44.1-78.4); AUC: 0.741 CI (0.612-0.869) N…
Olsson et al., 2018	68 ALS, 75 controls, 114 patients with mild cognitive impairment (MCI), 397 AD, 96 FTD, 41 PD, 19 PD with MCI, 29 with PD dementia, 33 LBD, 21 with corticobasal syndrome, 20 with progressive supranuclear palsy	68.7 (+/- 10)	no indication	MMSE	CSF	Nfl	In-house ELISA (2 NFLmousemonoclonal antibodies (NFL21 and NFL23))	Kruskal-Wallis test and the post hoc pairwise Mann-Whitney U tests ( for nonnormally distributed, nonparametric data to assess differences between groups), Benjamini-Hochberg procedure (Correction for multiple comparisons), Spearman rank correlation (Associations between NFL and T-tau, NFL and MMSE score, and between NFL and TDP-43 pathology), Fitting a logistic regression classifier (Inclusion o…	not tested	ALS: 4185 (2207-7453), CTRL: 536 (398-777), MCI: 831 (526-1075), AD: 951 (758-1261), FTD: 1873 (830-2588), PD: 619 (526-840), PD MCI: 779 (464-1021), PD dementia: 981 (679-1722), DLB: 991 (695-2139), CBS: 1281 (828-2713), PSP: 1578 (1287-3104)	no information
Delaby et al., 2020	46, ALS, 118 Controls, 116 AD, 47 Down Syndrome, 56, FTD, 37 DLB, 26 Prodromal DLB, 26 Corticobasal syndrome (CS), 12, Progressive supranuclear palsy (PSP)	ALS: 65.6 (11.3), Control: 59.4 (9.7), AD: 70.4 (8.0), DS: 51.2 (8.1), FTD: 65.8 (5.2), DLB: 82.2 (6.1), P-DLB: 82.2 (6.1), CS: 72.0 (7.3), PSP: 70.5 (7.8)	no indication	El Escorial criteria, MMSE	CSF	Nfl	ELISA kit (NF-light, UMAN DIAGNOSTICS, Umea, Sweden,)	Kruskal-Wallis test and the post hoc pairwise Mann-Whitney-tests (non-normal distribution, to assess differences between groups), Spearman rank correlation (Associations of NfL with other biomarkers and with MMSE score), All group comparaisons and correlation analysis were age and sex-adjusted, Bonferroni procedure (correction for multiple comparisons), ROC curve (AUC) analysis	not tested	ALS: 2953 (1664-4250), CTRL: 411 (343-567), AD: 940 (765-1229), DS: 349 (196-464), DS + AD: 955 (664-1497), FTLD: 1240 (859-2378), DLB: 1135 (803-1321), PDLB: 934 (643-1094), CBS: 1637 (923-2797) PSP: 1422 (1034-1727)	Data not shown
Oeckl et al., 2016	Multicenter study (15 centers, 5 ALS patients each( 150 ALS patients in total), Neurologic disease controls (details on composition in each center can be found in the respective paper)	detailed information are given in the respective Paper	no indication	El Escorial criteria, ALSFRS-R score	CSF	Nfl, pNFH	ELISA (pNfH, BioVendor GmbH; NfL, IBL International),Two aliqouts per sample One analysed at Neurochemical Laboratory at the Department of Neurology in Ulm and the other at the department of metabolic biochemistry, Hoˆpitaux Universitaires Pitie´ Salpeˆtrie`re-Charles Foix, Paris.	Mann-Whitney test (Comparison ALS and control groups), Kruskal-Wallis test and Dunn´ s posthoc test (Analyis of differences of ALS or control groups between centers), receiver operating characteristic (ROC) curve analysis (Sensitivity and specificity), Youden Index (cut-offs), Spearman’s rank correlation coefficient and nonlinear regression analysis (Correlations)	ALS: 4148.6 (average all centers, Ulm), CTRL 284.2 (average from all centers, Ulm) ALS: 11577.2 (average all centers, Paris), CTRL 1242.4 (average from all centers, Paris)	ALS: 1773.2 (average all centers, Ulm), CTRL 476.3 (average from all centers, Ulm), ALS: 1755.1 (average all centers, Paris), CTRL 288.8 (average from all centers, Paris)	Combination of control and ALS groups (n=75) to calculate the diagnostic sensitivity, specificity and a cut-off value of pNfH concentration: cut-off (Ulm): 568.5 pg/mL, AUC: 0.92 (95% CI 0.88-0.97), sensitivity: 78.7% (95% CI 67.7% -87.3%), specificity: 93.3% (95% CI 85.1% - 97.8%). cut-off (Paris): 472.5 pg/mL, sensitivity: 81.1%, specificity: 83.6% ROC analysis in the cumulative dataset (Con: n…
De Schaepdryver et al., 2017	85 ALS, 215 disease controls (DC), 31 disease mimics (DM)	detailed information are given in the respective Paper	genetically tested	Awaji and El Escorial	CSF and Plasma	Nfl, pNFH	ELISA for pNfH concentrations (Euroimmun AG, Lübeck, Germany). ELISA from Biovendor (RD191138300R, Brno, Czech Republic), from 83 patients with ALS and 213 controls were used from the previous publication,9 to perform a paired method comparison with the IVD ELISA from Euroimmun.	Shapiro-Wilk test (Normal distribution, non-parametric Kruskal-Wallis test at a 5% significance level (non-normal distribution) , Dunn post hoc test (Correction for multiple comparisons), Area under the curve (AUC), Receiver operating characteristic (ROC) curves (Sensitivity, specificity, positive predictive value (PPV), negative predictive value (NPV), positive likelihood eatio and AUC with corr…	ALS: 2451 (314-17247); DC: 281 (20-13669)	not measured	Elevated CSF pNfH in patients with ALS versus DC: sensitivity: 88.2% (CI: 79.4% to 94.2%), specificity: 85.3% (CI: 79.5% to 90.0%), PPV: 72.8% (CI: 65.3% to 79.2%), NPV: 94.2% (CI: 90.1% to 96.7%). cut-off value of CSF pNfH to discriminate ALS from ALS mimics: 750 pg/mL, sensitivity: 92.9% (CI: 85.3% to 97.4%), specificity: 96.0% (CI: 79.6% to 99.9%), a PPV of 98.7% (CI: 92.0% to 99.8%), NPV: 80.…

## Sheet: Tabelle2
Paper
Poesen et al., 2017
Rossi et al., 2018
Olsson et al., 2018
Delaby et al., 2020
Oeckl et al., 2016
De Schaepdryver et al., 2017

## Sheet: Tabelle3
Paper	Cohort size and composition	Age	Mutations	Patient Criteria	Body Fluid	Marker	Method for Nfl, pNfl	Results pNFH pg/mL	Results Nfl pg/mL
Poesen et al., 2017	220 ALS, 316 neurologic disease controls (DC), 50 disease mimics (DM)	ALS: 64 (27–85), DC: 60 (8–86) DM: 57 (25–79)	ALS: C9orf72 (12), SOD1 (9), FUS (3), TARDBP (2)	El Escorial criteria, ALSFRS-R score	CSF	Nfl, pNfl	ELISA kits for pNfH (Biovendor, Brno, Czech Republic; RD191138300R, average test-retest variance of 6.8%) and NfL (UmanDiagnostics AB, Umea, Sweden; UD51001, average test-retest variance of 4.9%).	ALS: 2,366 (114–18,089), DC: 289 (24–18,740) DM: 296 (24–7,049)	ALS: 9,427 (370–108,909). DC: 1,790 (262–53,677), DM: 1,407 (613–36,597)
Rossi et al., 2018	190 ALS, 130 mixed neurological diseases CTL-1 (non-inflammatory neurological diseases), CTL-2 (atients with acute/subacute inflammatory diseases and tumors)	ALS: 64 (57–71), neurological diseases: 64 (52–72), 63 (56–72)	no mutations	El Escorial criteria, ALSFRS-R score	CSF	Nfl, pNfl	Single-batch ELISA kits for NF-L assays (iMyBioSource San Diego, USA and UmanDiagnostics AB, Umeå, Sweden). For pNF-ELISA kit from BioVendor Research and Diagnostic Product, Czech Republic)	ALS:1,700 (760–3,170), CTRL 1: 30 (0.00-320) CTRL2: 820 (0.00–3470)	MyoBioSource kit: ALS: 2,140 (1,350–3,300), CTRL 1: 2,040 (1,250-3,390) CTRL2: 3,090 (1,120-4,590); UmanDiagnostics kit: ALS: 4,700 (760-3,170) CTRL 1: 300 (0.00-320) CTRL 2: 820 (0.00-3,470)
Olsson et al., 2018	68 ALS, 75 controls, 114 patients with mild cognitive impairment (MCI), 397 AD, 96 FTD, 41 PD, 19 PD with MCI, 29 with PD dementia, 33 LBD, 21 with corticobasal syndrome, 20 with progressive supranuclear palsy	68.7 (+/- 10)	no indication	MMSE	CSF	Nfl	In-house ELISA (2 NFLmousemonoclonal antibodies (NFL21 and NFL23))	not tested	ALS: 4185 (2207-7453), CTRL: 536 (398-777), MCI: 831 (526-1075), AD: 951 (758-1261), FTD: 1873 (830-2588), PD: 619 (526-840), PD MCI: 779 (464-1021), PD dementia: 981 (679-1722), DLB: 991 (695-2139), CBS: 1281 (828-2713), PSP: 1578 (1287-3104)
Delaby et al., 2020	46, ALS, 118 Controls, 116 AD, 47 Down Syndrome, 56, FTD, 37 DLB, 26 Prodromal DLB, 26 Corticobasal syndrome (CS), 12, Progressive supranuclear palsy (PSP)	ALS: 65.6 (11.3), Control: 59.4 (9.7), AD: 70.4 (8.0), DS: 51.2 (8.1), FTD: 65.8 (5.2), DLB: 82.2 (6.1), P-DLB: 82.2 (6.1), CS: 72.0 (7.3), PSP: 70.5 (7.8)	no indication	El Escorial criteria, MMSE	CSF	Nfl	ELISA kit (NF-light, UMAN DIAGNOSTICS, Umea, Sweden,)	not tested	ALS: 2953 (1664-4250), CTRL: 411 (343-567), AD: 940 (765-1229), DS: 349 (196-464), DS + AD: 955 (664-1497), FTLD: 1240 (859-2378), DLB: 1135 (803-1321), PDLB: 934 (643-1094), CBS: 1637 (923-2797) PSP: 1422 (1034-1727)
Oeckl et al., 2016	Multicenter study (15 centers, 5 ALS patients each( 150 ALS patients in total), Neurologic disease controls (details on composition in each center can be found in the respective paper)	detailed information are given in the respective Paper	no indication	El Escorial criteria, ALSFRS-R score	CSF	Nfl, pNfl	ELISA (pNfH: BioVendor GmbH; NfL: IBL International),Two aliqouts per sample One analysed at Neurochemical Laboratory at the Department of Neurology in Ulm and the other at the department of metabolic biochemistry, Hoˆpitaux Universitaires Pitie´ Salpeˆtrie`re-Charles Foix, Paris.	ALS: 1773.2 (average all centers, Ulm), CTRL 476.3 (average from all centers, Ulm), ALS: 1755.1 (average all centers, Paris), CTRL 288.8 (average from all centers, Paris)	ALS: 4148.6 (average all centers, Ulm), CTRL 284.2 (average from all centers, Ulm) ALS: 11577.2 (average all centers, Paris), CTRL 1242.4 (average from all centers, Paris)
De Schaepdryver et al., 2017	85 ALS, 215 disease controls (DC), 31 disease mimics (DM)	detailed information are given in the respective Paper	genetically tested	Awaji and El Escorial	CSF and Plasma	Nfl, pNfl	ELISA for pNfH concentrations (Euroimmun AG, Lübeck, Germany). ELISA from Biovendor (RD191138300R, Brno, Czech Republic), from 83 patients with ALS and 213 controls were used from the previous publication,9 to perform a paired method comparison with the IVD ELISA from Euroimmun.	ALS: 2451 (314-17247); DC: 281 (20-13669)	not measured
